# Supplementary material for: Gene-edited murine cell lines for propagation of chronic wasting disease prions
Source: PubMed Central journal article supplement (PMC6673760; doi:10.1038/s41598-019-47629-z), 2019-08-01

# **Gene-edited murine cell lines for propagation of chronic wasting disease prions**

Rupali Walia, Cheng Ching Ho, Chi Lee, Sabine Gilch and Hermann M. Schatzl

**Supplementary Data**

```

CAD5_WT      CCTGGAGGGTGGAAACACCGGTGGAAGCCGGTATCCCAGGAGCCCTGGAGGCAAC
CAD5_KO2A    CCTGGAGGGTGGAAACACCGGTG-----
CAD5_KO2B    CCTGGAGGGTGGAAACACCGGTAT---CGGTATCCCAGGAGCCCTGGAGGCAAC
CAD5_KO2C    CCTGGAGGGTGGAAACACCGGTAT---CCCAGGAGCCCTGGAGGCAAC
*****.

CAD5_WT      CGTTACCCACCTCAGGGTGGCACCTGGGGGCAGCCCCACGGTGGTGGCTGGGGACAACCC
CAD5_KO2A    -----
CAD5_KO2B    CGTTACCCACCTCAGGGTGGCACCTGGGGGCAGCCCCACGGTGGTGGCTGGGGACAACCC
CAD5_KO2C    CGTTACCCACCTCAGGGTGGCACCTGGGGGCAGCCCCACGGTGGTGGCTGGGGACAACCC

CAD5_WT      CATGGGGGCAGCTGGGGACAACCTCATGGTGGTAGTTGGGGTCAGCCCCATGGCGGTGGA
CAD5_KO2A    -----
CAD5_KO2B    CATGGGGGCAGCTGGGGACAACCTCATGGTGGTAGTTG-----
CAD5_KO2C    CATGGGGGCAGCTGGGGACAACCTCATGGTGGTAGTTG-----

CAD5_WT      TGGGGCCAAGGAGGGGGTACCCATAATCAGTGAACAAGCCCAGCAAACCA
CAD5_KO2A    -----GAGGAGGGGGTACCCATAATCAGTGAACAAGCCCAGCAAACCA
CAD5_KO2B    -----GGGTCAGCCCCATGGCGGTGGAACAAGCCCAGCAAACCA
CAD5_KO2C    -----GGGTCAGCCCCATGGCGGTGGAACAAGCCCAGCAAACCA
***  :.***.:. * .*****

```

**Supplementary Figure S1a: *Indel* signatures in CAD5-KO2 clone.**

Genomic PCR was done from CAD5-KO2 cell clone using PrP-F and PrP-R primers and cloned into a bacterial mini library . Sequence comparison of ten bacterial inserts with the wild type control (CAD5\_WT) shows : CAD5\_KO2A having a large deletion between gRNA1 and gRNA2 (the same sequence appeared in 7/10 bacterial clones) while CAD5\_KO2B and CAD5\_KO2C had disruptions/smaller deletions at the gRNA1 and gRNA 2 site and appeared in 2/10 and 1/10 sequences respectively. Yellow and blue regions represent the gRNA1 and gRNA2 sites, respectively. Sequence in red represents *indels*.

CLUSTAL 2.1 multiple sequence alignment

```
MEF_KO1      CCTGGAGGGTGGAAACACCGGTGGAAGCCGGTATCCCGGGCAGGGAAGCCCTGGAGGCAAC
MEF_KO2      CCTGGAGGGTGGAAACACCGGTGGAAGCCGGTATCCCGGGCAGGGAAGCCCTGGAGGCAAC
MEF_WT       CCTGGAGGGTGGAAACACCGGTGGAAGCCGGTATCCCGGGCAGGGAAGCCCTGGAGGCAAC
*****

MEF_KO1      CGTTACCCACCTCAGGGTGGCACCTGGGGGCAGCCCCACGGTGGTGGCTGGGGACAACCC
MEF_KO2      CGTTACCCACCTCAGGGTGGCACCTGGGGGCAGCCCCACGGTGGTGGCTGGGGACAACCC
MEF_WT       CGTTACCCACCTCAGGGTGGCACCTGGGGGCAGCCCCACGGTGGTGGCTGGGGACAACCC
*****

MEF_KO1      CATGGGGCAGCTGGGGACAACCTCATGGTGGTAGTTGGGGTCAGCCCCATGGCGGTGGA
MEF_KO2      CATGGGGCAGCTGGGGACAACCTCATGGTGGTAGTTGGGGTCAGCCCCATGGCGGTGGA
MEF_WT       CATGGGGCAGCTGGGGACAACCTCATGGTGGTAGTTGGGGTCAGCCCCATGGCGGTGGA
*****

MEF_KO1      TGGGGCCAAGGAGGGGGTACCATAATCAGTGGAAACAAGCCAGCAAACCAAAAACCAA
MEF_KO2      TGGGGCCAAG-----GGGTACCATAATCAGTGGAAACAAGCCAGCAAACCAAAAACCAA
MEF_WT       TGGGGCCAAGG-AGGGGGTACCATAATCAGTGGAAACAAGCCAGCAAACCAAAAACCAA
*****
```

**Supplementary Figure S1b: *Indel* signature in MEF-KO clones.**

Genomic PCR was done from a representative CC9 clonal isolate of MEF cells using PrP-F and PrP-R primers. Sequence comparison of PCR amplicons (cloned into a bacterial mini library - KO1 and KO2) with the wild type (MEF\_WT) shows *indels* at the gRNA2 target site. Yellow and blue regions represent the gRNA1 and gRNA2 sites, respectively. Sequence in red represents *indels*.

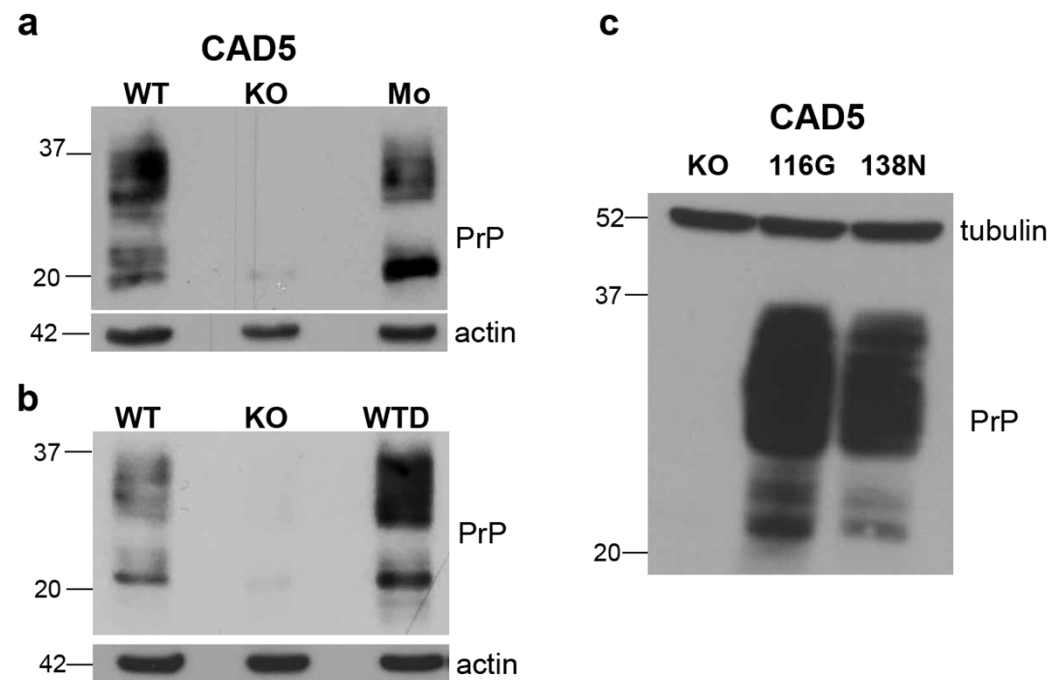

**Supplementary Figure S2: Stable reconstitution of CAD5 PrP<sup>-/-</sup> cells (KO2) with MoPrP and cervid WTD, 116G, and 138N PrP using lentiviral transduction.**

**(a)** Western blot analysis showing expression of Mo-PrP in transduced cells. **(b)** Western blot showing the expression of wild-type WTD-PrP (white-tailed deer) in transduced cells. **(c)** Western blot showing expression of 116G and 138N-PrP in transduced cells. WT represents the parental wild-type CAD5 cells expressing murine PrP and KO represents the CAD5 knock-out background (KO2). The blots were probed with anti-PrP mAb 4H11 and actin or tubulin was used as a loading control

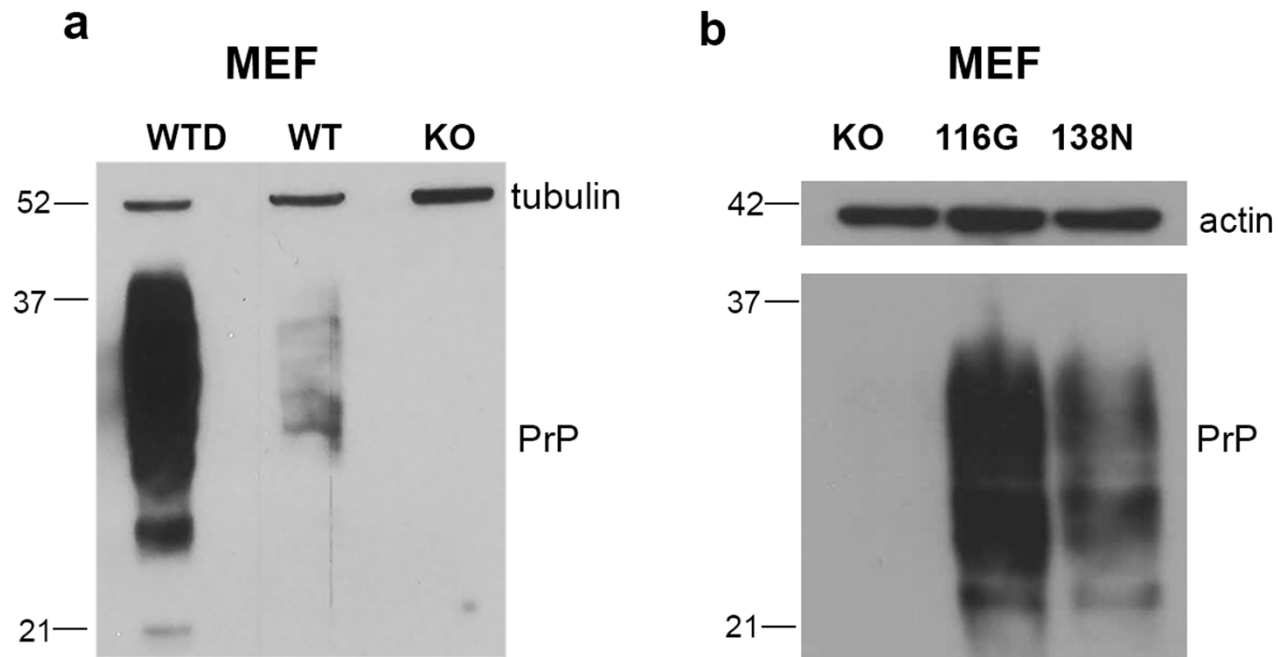

**Supplementary Figure S3: Stable reconstitution of MEF PrP<sup>-/-</sup> cells (KO1) with cervid WTD, 116G and 138N polymorphic PrP variants using lentiviral transduction.**

**(a)** Western blot analysis showing the expression of wild type WTD-PrP (white-tailed deer) in transduced cells. **(b)** Western blot showing expression of 116G and 138N-PrP in transduced cells. WT represents the parental MEF wild-type cells expressing murine PrP and KO represents the MEF knock out cells (KO1). The blots were probed with anti-PrP mAb 4H11 and tubulin was used as a loading control.

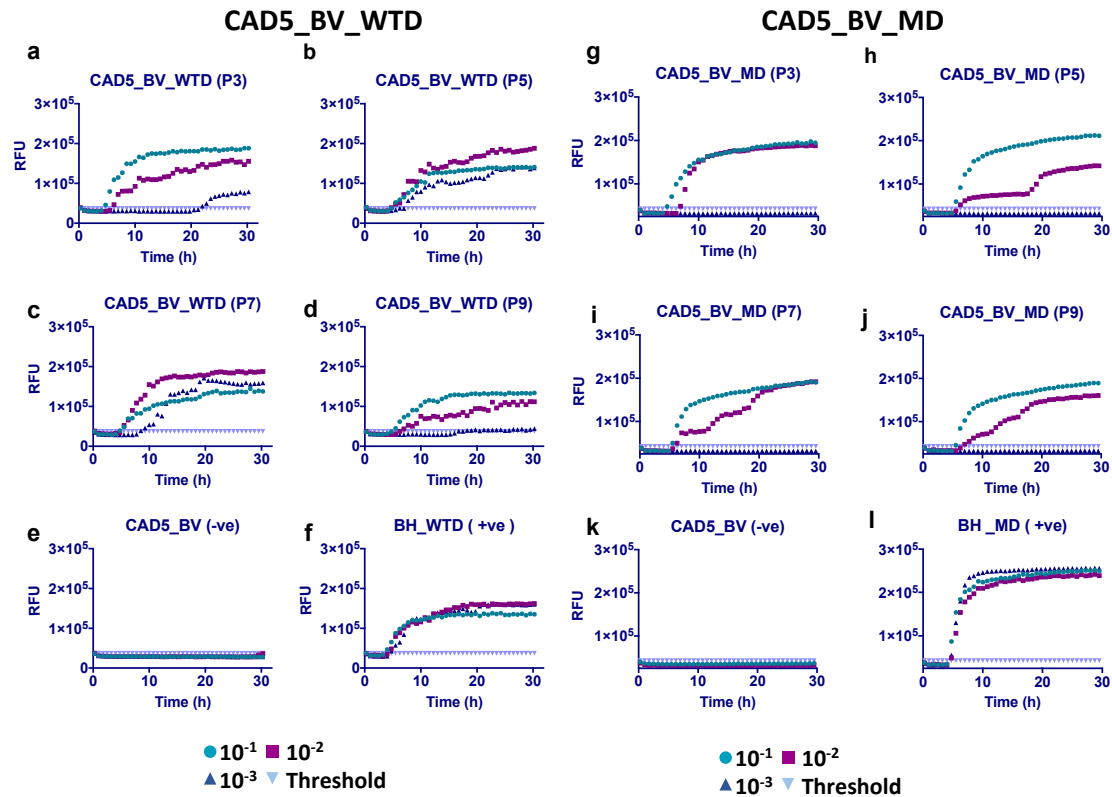

**Supplementary Figure S4: RT-QuIC analysis showing positive prion seeding activity in CAD5\_BV cells with white-tailed deer (WTD) and mule deer (MD) CWD prions.**

RT-QuIC assay was setup as done in Fig. 5. A positive seeding activity was seen up to passage P9 in cells infected with white-tailed deer (CAD5\_BV\_WTD) prions (**a-d**) as well as with mule deer (CAD5\_BV\_MD) CWD prions (**g-j**). (**e, k**) represent uninfected cell lysate at passage 3 (negative control). (**f, l**) 1% WTD- and MD-brain homogenate (BH) was used as positive control for the assay.

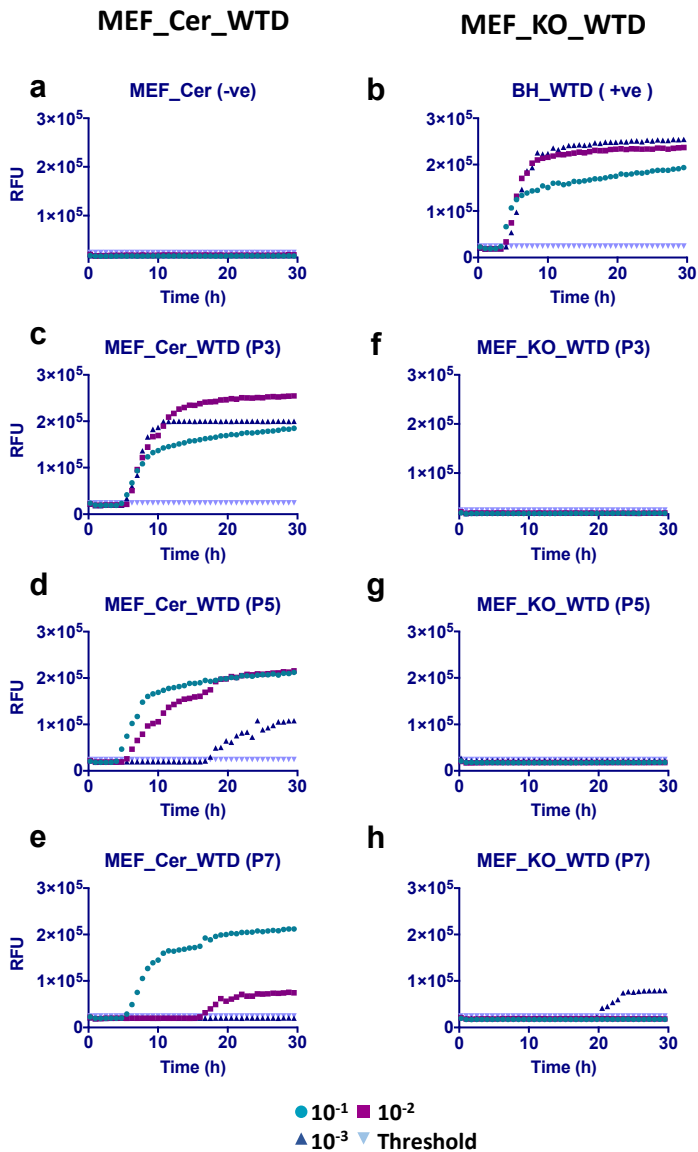

**Supplementary Figure S5: RT-QuIC analysis showing positive prion seeding activity in MEF\_Cer cells infected with WTD CWD prions and absence of seeding activity in infected knock out cells (MEF\_KO\_WTD).**

RT-QuIC assay was setup as done in Fig. 5. A positive seeding activity was seen in passage P3-P7 in cells infected with white-tailed deer (MEF\_Cer\_WTD) prions **(c-e)**. No seeding activity was observed in infected non-reconstituted knock out (MEF\_KO\_WTD) cells **(f-h\*)**. **(a)** represents uninfected cell lysate at passage 3 (negative control). **(b)** 1% WTD-brain homogenate (BH) was used as positive control for the assay.

\* Sample h is negative as only one out of four replicates showed a weak signal. Samples are scored positive when at least 50% of the replicates ( $\geq 2$  out of 4) reached a ThT fluorescence cut-off.

**Supplementary Table S1: Oligonucleotides and primers used in this study**

| <b>No.</b> | <b>Oligo/ Primer</b> | <b>Sequence</b>                           |
|------------|----------------------|-------------------------------------------|
| 1          | gRNA1                | GGTGGAACACCGCTGGAAGC                      |
| 2          | gRNA2                | GATTATGGGTACCCCCTCCT                      |
| 3          | PrPF                 | ATGGCGAACCTTGGCTACTGGCTG                  |
| 4          | PrPR                 | TCATCCCACGATCAGGAAGATG                    |
| 5          | LV- Mo-PrPF          | TTTTTGAATTCGCCACCATGGCGAACCTTGGCTACTGGCTG |
| 6          | LV- Mo-PrPR          | TTTTGGATCCTCATCCCACGATCAGGAAGATG          |
| 7          | LV- BV-PrPF          | GATGATGGATCCATGGCGAACCTCAGCTACTG          |
| 8          | LV- BV-PrPR          | ACGCGTTCATCCCACGATCAGGAAGA                |
| 9          | LV- Cer-PrPF         | GATGATGGATCCATGGTGAAAAGCCACATAGGC         |
| 10         | LV- Cer-PrPR         | ACGCGTCTATCCTACTATGAGAAAAAT               |



# **Gene-edited murine cells for propagation of chronic wasting disease prions.**

Rupali Walia, Cheng Ching Ho, Chi Lee, Sabine Gilch and Hermann M. Schatzl

**Supplementary: Original Blots**

Figure 2d, 2e, 2f

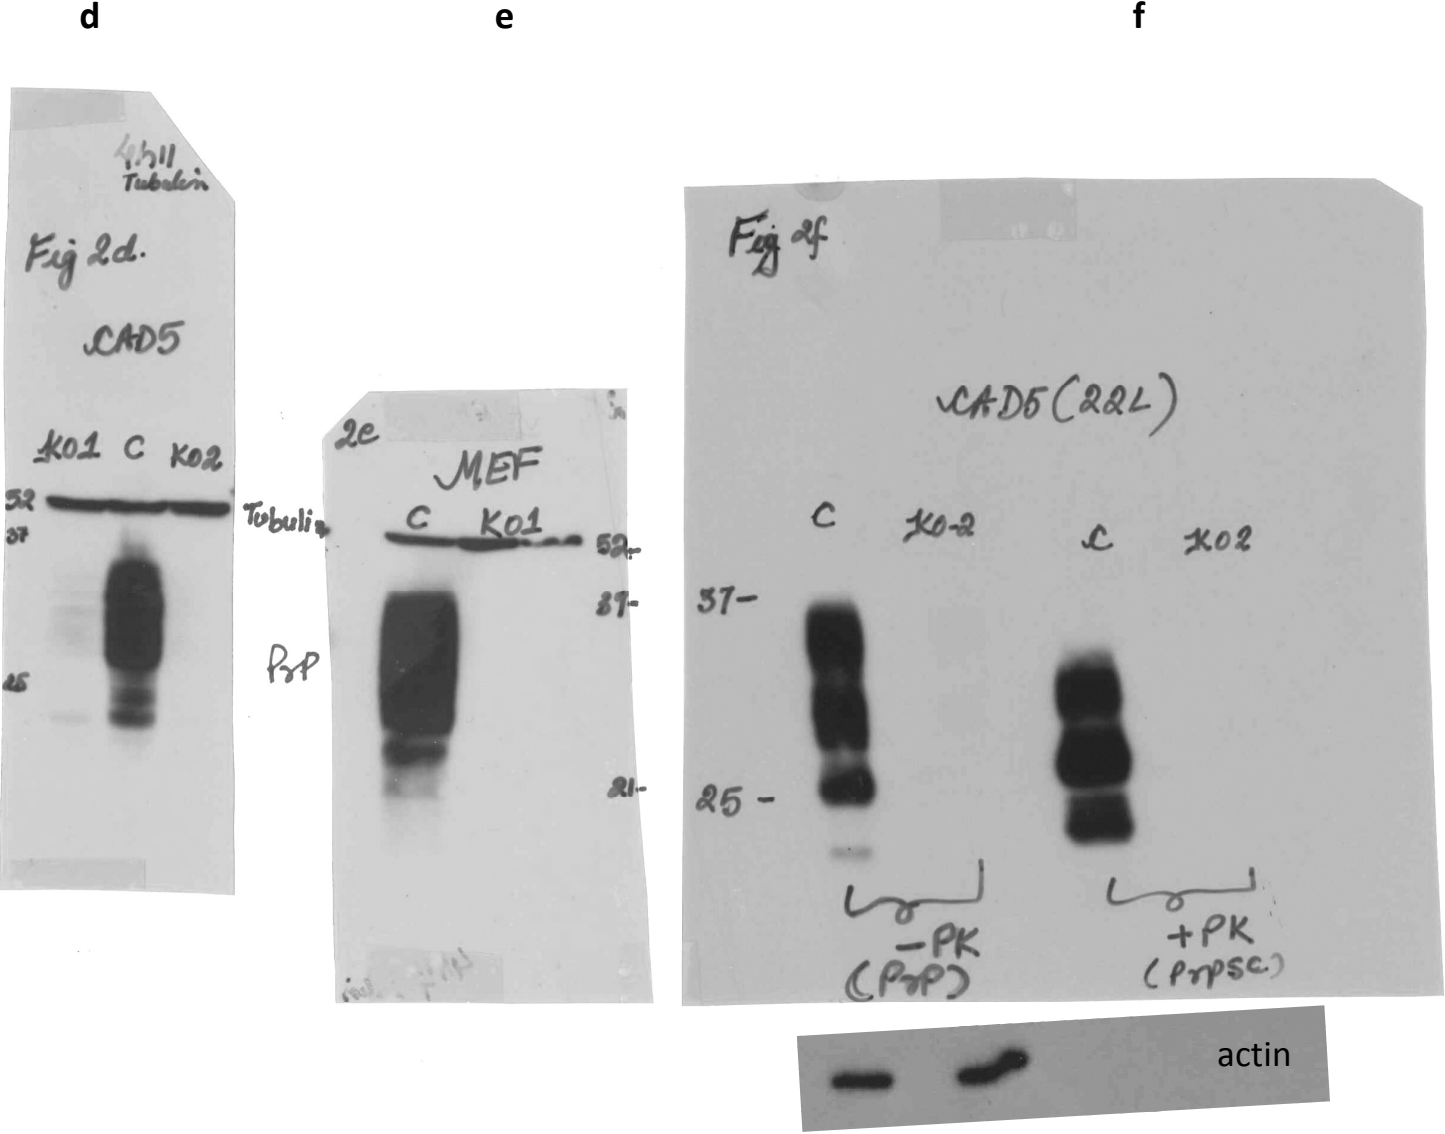

Figure 3c, 3f

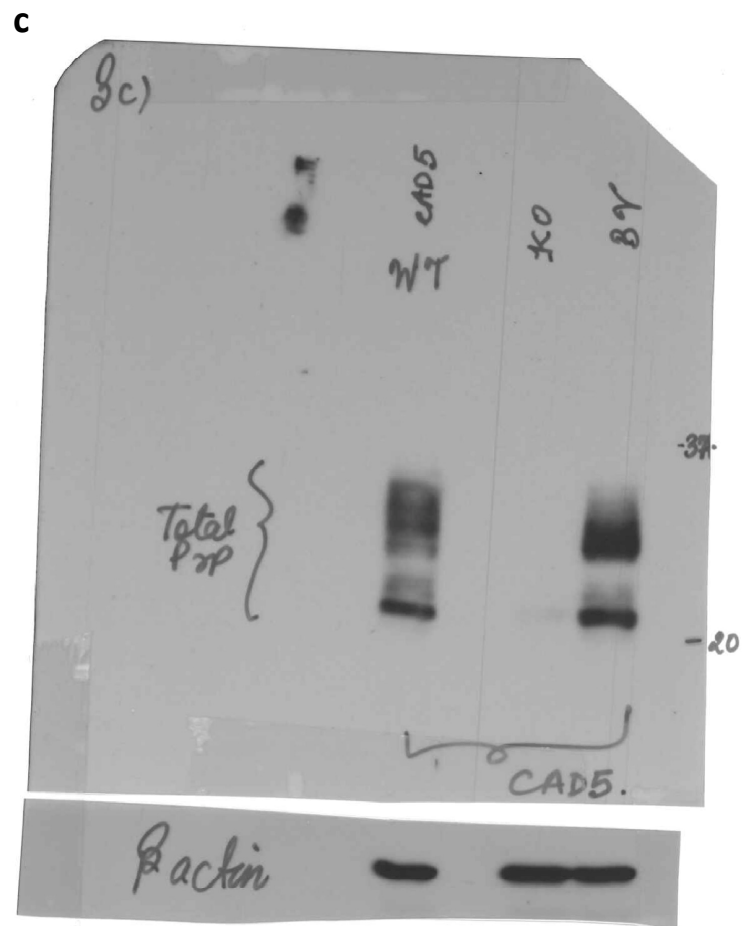

f

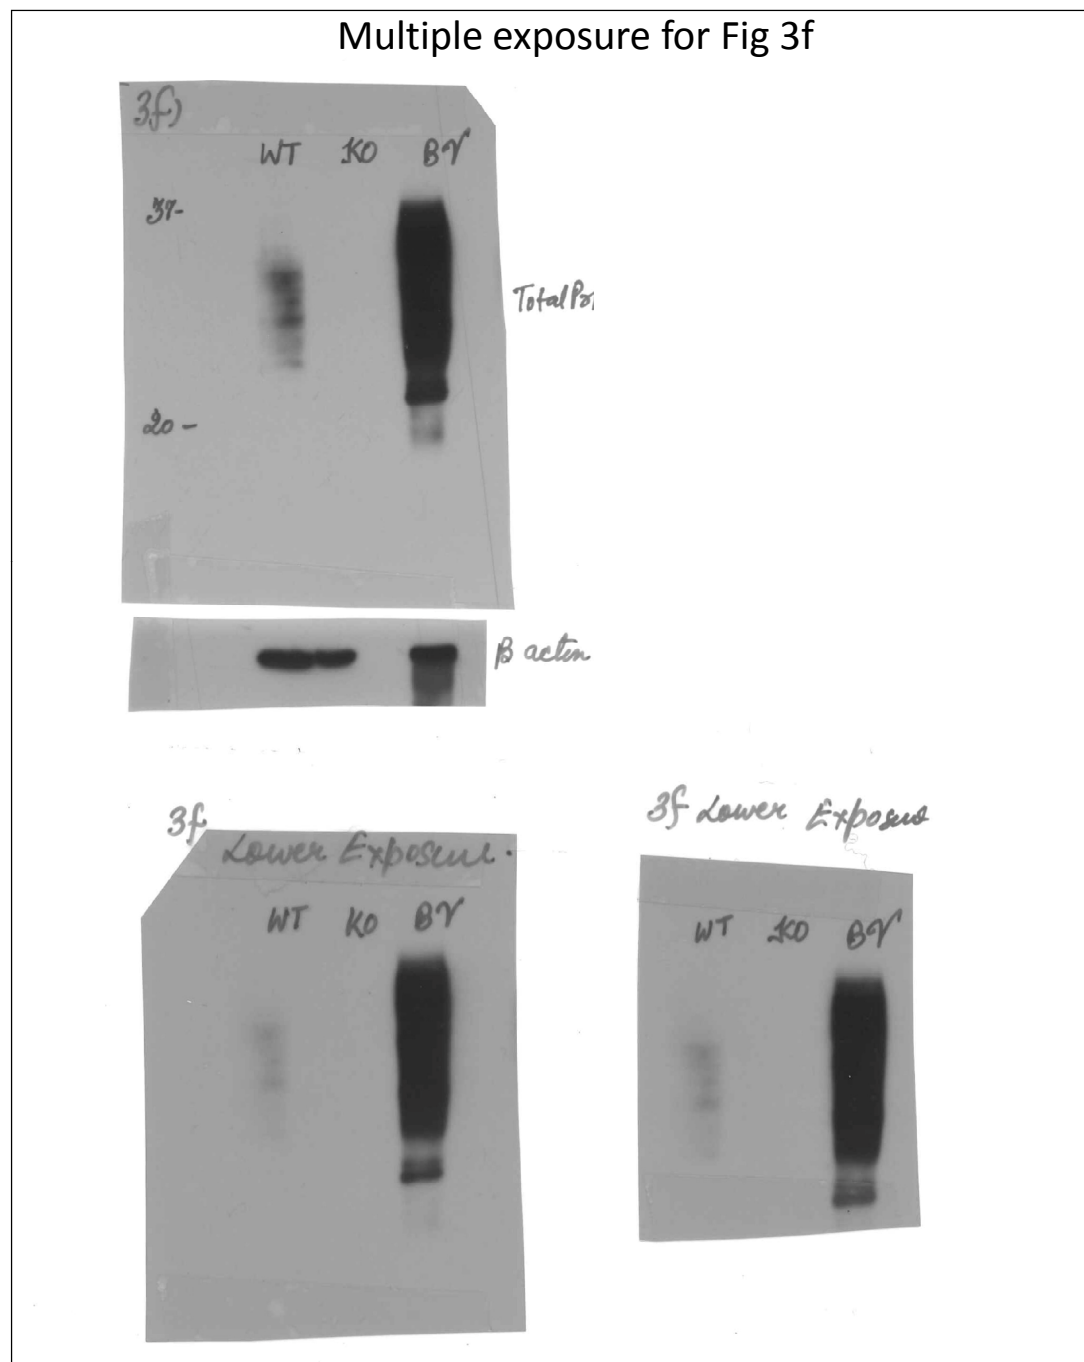

Figure 4a , 4b

Multiple exposure for Fig 4a and 4b

a

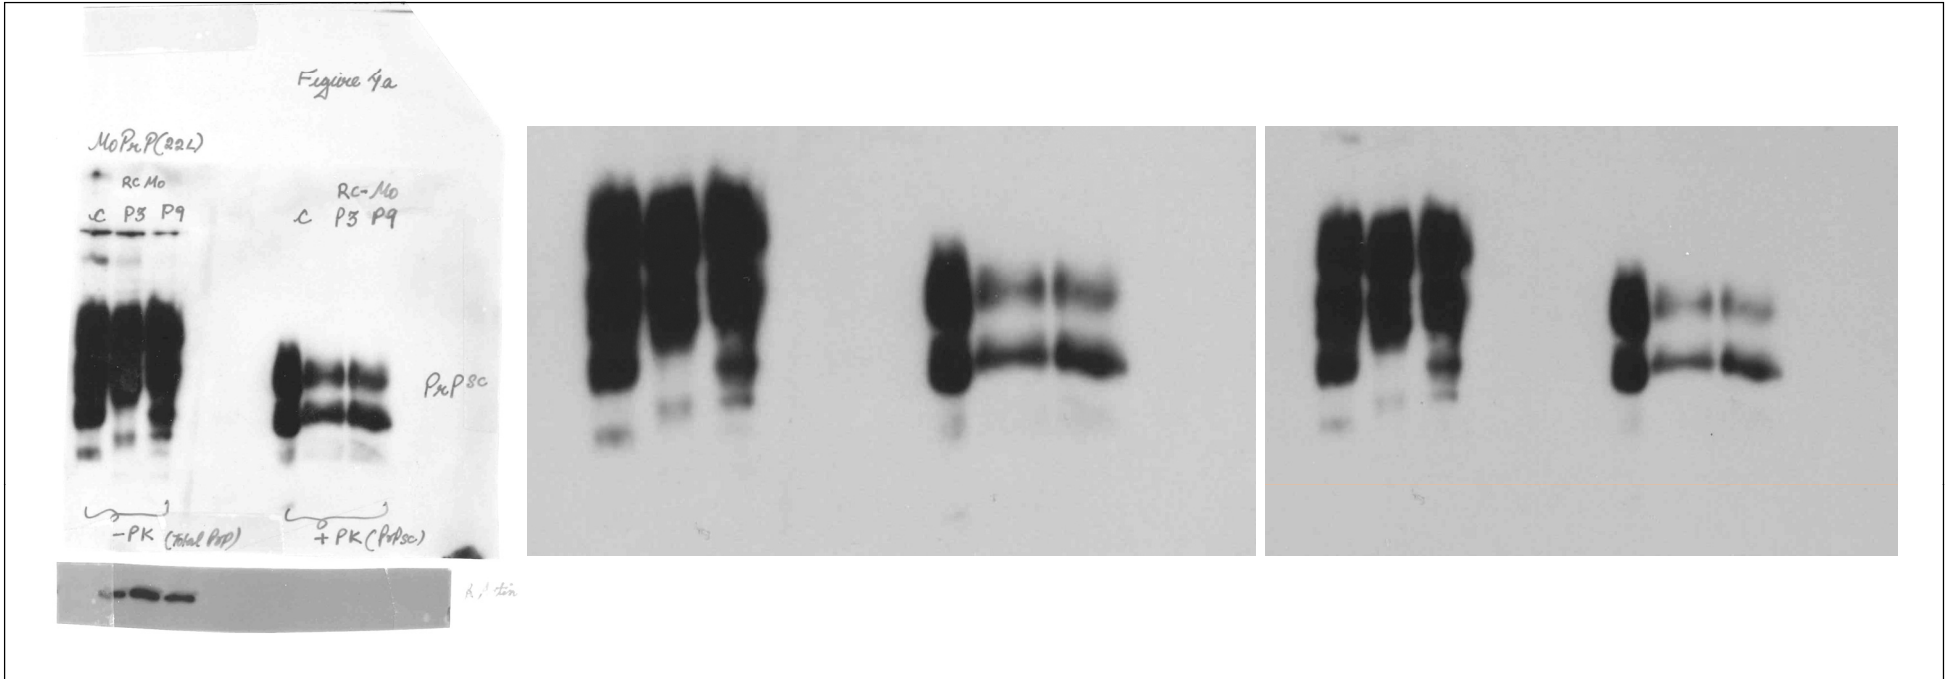

b

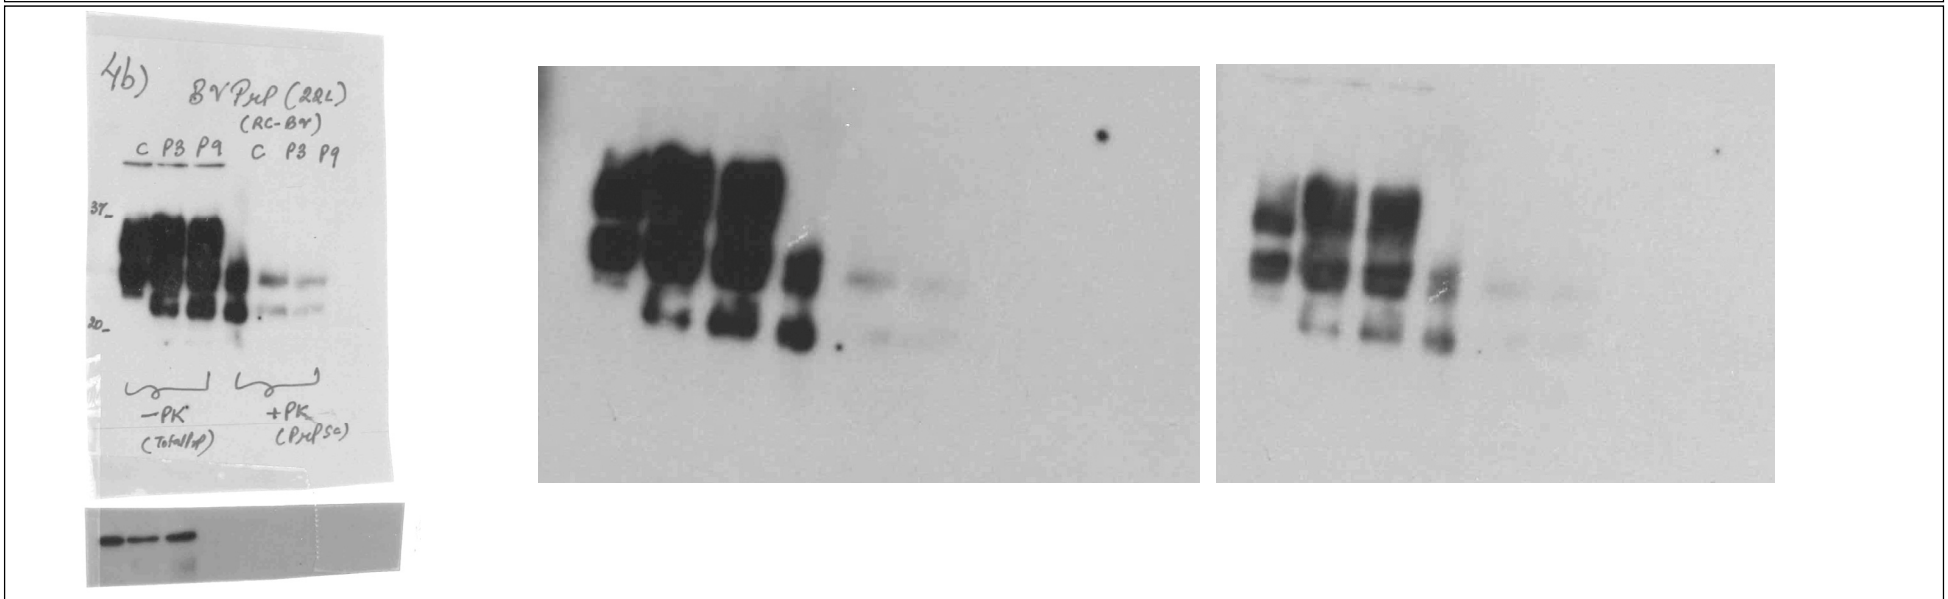

Figure S2 a, b, c

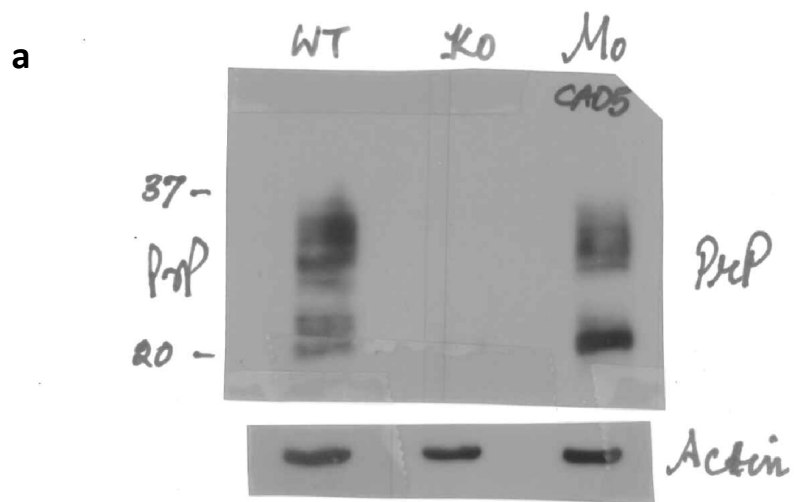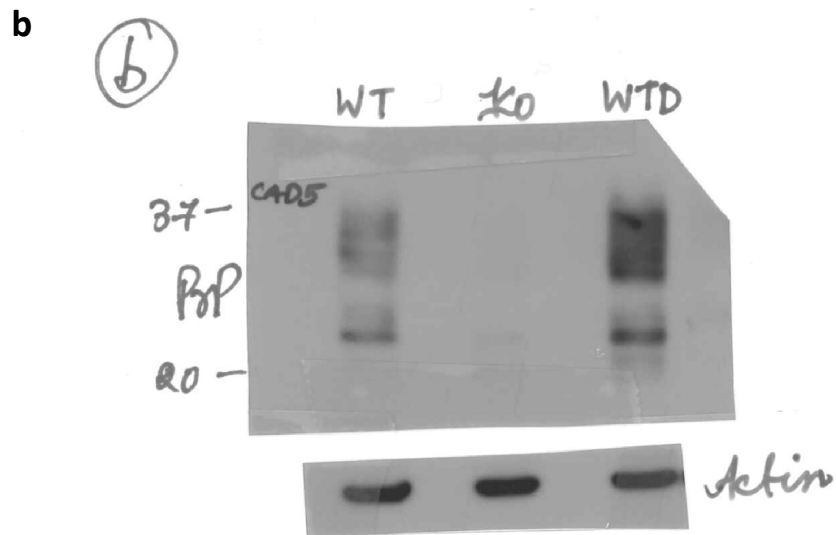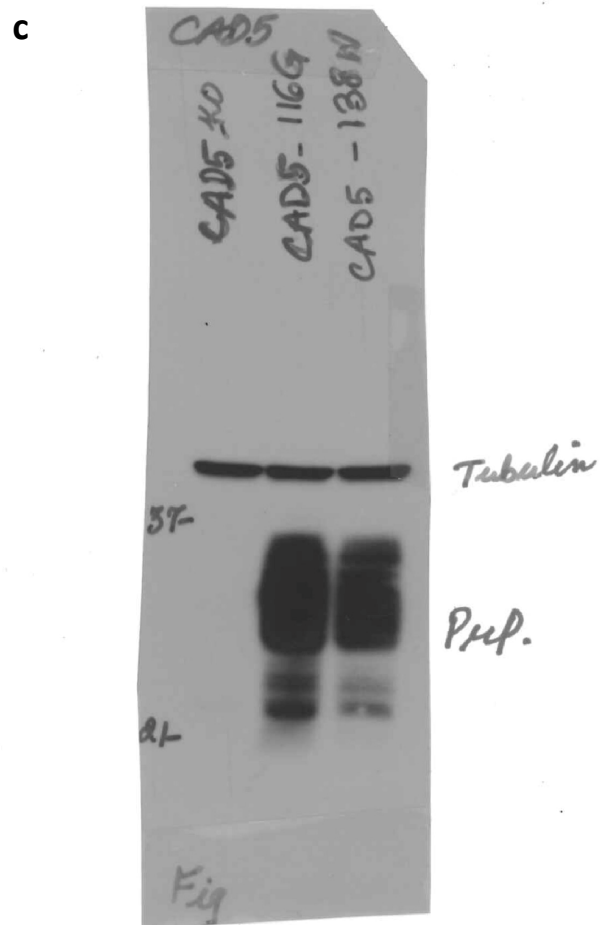

Figure S3 a, b

a

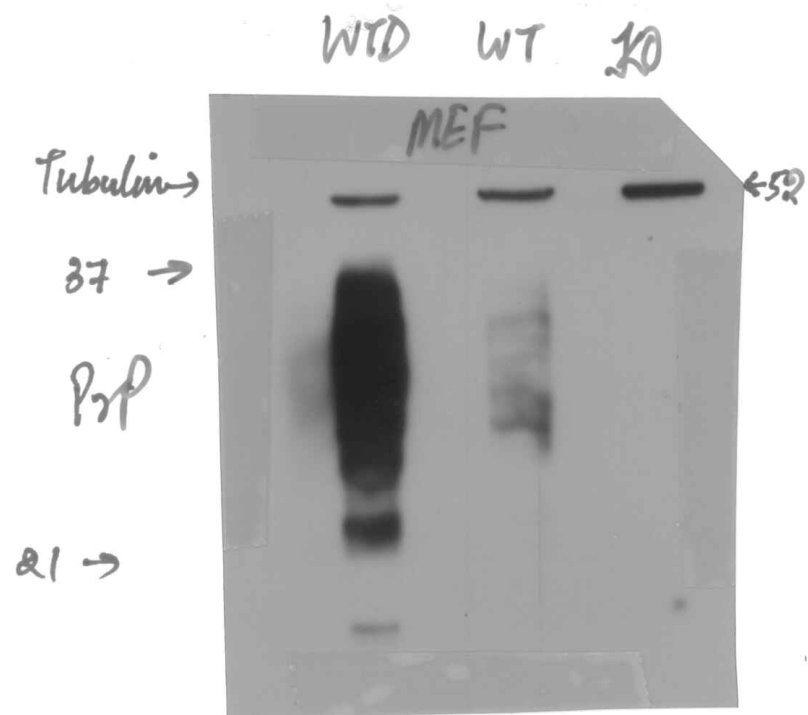

b

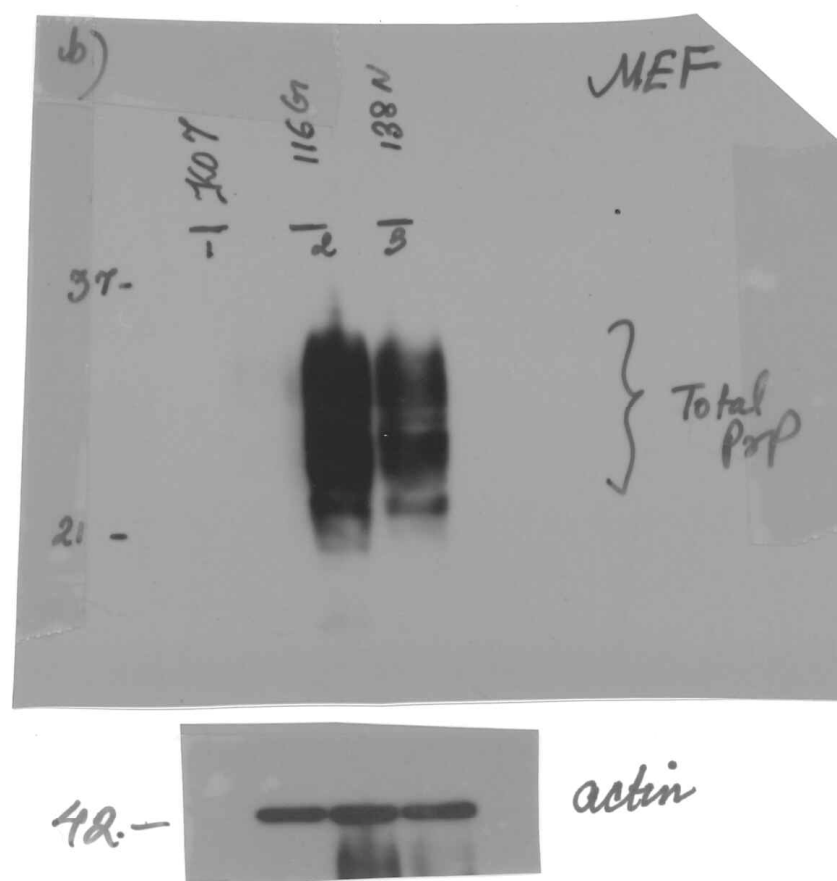

Supplement: 41598_2019_47629_MOESM1_ESM.pdf [file 41598_2019_47629_MOESM1_ESM.pdf]
